# Supplementary material for: A Quality Indicator Set for Rehabilitation Services for People With Rheumatic and Musculoskeletal Diseases Demonstrates Adequate Responsiveness in A Pre–Post Evaluation
Source: Research Square preprint supplement (doi:10.21203/rs.3.rs-110834/v1), 2020-11-30
Supplement: Supplementary file 1 [file 13f3f8beea719963e57a2b64.docx]

# Additional file 1, in the manuscript:

# A quality indicator set for rehabilitation services for people with rheumatic and musculoskeletal diseases demonstrates adequate responsiveness in a pre–post evaluation

Anne-Lene Sand-Svartrud1*, Gunnhild Berdal1, Maryam Azimi2, Ingvild Bø3, Turid Nygaard Dager1, Siv Grødal Eppeland4, Guro Ohldieck Fredheim5, Anne Sirnes Hagland6, Åse Klokkeide7, Anita Dyb Linge8, Kjetil Tennebø9, Helene Lindtvedt Valaas5, Ann Margret Aasvold10, Hanne Dagfinrud1 and Ingvild Kjeken1

1National Advisory Unit on Rehabilitation in Rheumatology, Diakonhjemmet Hospital, PO Box 23 Vinderen, N- 0319 Oslo, Norway.

2Diakonhjemmet Hospital, PO Box 23 Vinderen, N- 0319 Oslo, Norway.

3Hospital for Rheumatic Diseases Lillehammer, Margrethe Grundtvigs veg 6, N-2609 Lillehammer, Norway.

4Sørlandet Hospital Arendal, PO Box 416 Lundsiden, N-4604 Kristiansand,Norway.

5Vikersund Rehabililation Center, Haaviks vei 25, N-3370 Vikersund, Norway.

6Hosptial for Rheumatic Diseases Haugesund, PO Box 2175, N-5504 Haugesund, Norway.

7Rehabilitering Vest Rehabiliation Center, PO Box 2175, N-5504 Haugesund, Norway.

8Muritunet Rehabiliation Center, Grandedata 58, N-6210 Valldal, Norway.

9Valnesfjord Health Sports Center, Østerkløftveien 249, N-8215 Valnesfjord, Norway.

10Meråker Rehabiliation Center, Østigardsveien 24, N-7530 Meråker, Norway.

*Corresponding author. Correspondence: [anne-lene.svartrud@diakonsyk.no](mailto:anne-lene.svartrud@diakonsyk.no)

| **Additional file 1** Organization of rehabilitation programs at participating centres | | | | | | | | | |
| --- | --- | --- | --- | --- | --- | --- | --- | --- | --- |
| Participating centres | | 1 | 2 | 3 | 4 | 5 | 6 | 7 | 8 |
| **Organization (the same for both T1 and T2):** | | | | | | | | | |
| Healthcare system | Norwegian public healthcare system with equal access to all health care services | x | x | x | x | x | x | x | x |
| Level of care | Secondary level (specialist health care) | x | x | x | x | x | x | x | x |
| Type of setting | Hospital department of rheumatology | x | x |  |  |  | x |  |  |
| Specialized rehabilitation institution |  |  | x | x | x |  | x | x |
| Primary  diagnoses  (1=the biggest group, 5=the smallest) | Inflammatory arthritis | 1 | 1 | 1 | - | 2 | 1 | 2 | 1 |
| Connective tissue diseases | 2 | 2 | - | - | 4 | 2 | - | 2 |
| Wide spread pain or fibromyalgia | - | - | 2 | 1 | 3 | - | 1 | 3 |
| Unspecific low back pain, neck- or shoulder pain (persistent>3 months) | - | - | 3 | 2 | 1 | - | 2 | - |
| Osteoarthritis | - | - | 2 | - | 5 | - | 3 | 3 |
| Osteoporosis | - | - | - | - | - | - | - | - |
| Length of stay | 2 weeks |  | x |  |  |  | x |  |  |
| 3-4 weeks | x |  | x | x | x |  | x | x |
| Professions in the rehabilitation team | Medical doctor* | x | x | x | x | x | x | x | x |
| Physiotherapist | x | x | x | x | x | x | x | x |
| Occupational therapist | x | x | x | x | x | x | x | x |
| Nurse | x | x | x | x | x | - | x | x |
| Social worker | x | x | x | - | x | x | x | x |
| Psychologist | - | x | - | - | - | - | - | - |
| Nutritionist or dietist | - | x | x | x | x | - | x | x |
| Other | x | x | x | x | x | x | x | x |
| **Further information about organization at T1 (before adding the BRIDGE program):** | | | | | | | | | |
| Communication form in the rehabilitation team | A single team meeting during the stay (the whole team) |  |  |  |  |  | x |  |  |
| Weekly team meetings (once a week or more frequent) | x | x | x | x | x | - | x | x |
| Other meetings when needed (formal or informal) | x | x | x | x | x | x | x | x |
| Patient participation (PP) | PP in team meetings at admission and discharge | x | x | - | - | - | - | - | - |
| PP in all team meetings (the whole team) | - | x | - | - | - | - | - | - |
| PP in regular meetings with a representative of the team | x | x | - | x | x | - | - | x |
| Group-based PP in team meetings | - | - | - | - | - | - | x | - |
| Family involvement | Standard for family involvement | - | - | x | - | - | - | - | - |
| Family involvement based on indication | x | - | x | - | - | x | x | x |
| Follow-up | Standard for follow-up management | - | x | x | - | x | x | x | - |
| Goals | Individual goals defined together with team member(s) | x | x | x | x | x | x | x | x |
| Standardized assessment of individual goals | - | - | - | - | x | - | - | - |
| Standardized assessment | On admission | x | x | x | x | x | x | x | x |
| At discharge (evaluation) | x | x | x | x | x | x | - | x |
| Treatment by health professionals | On individual levels | x | x | x | x | x | x | x | x |
| In group sessions | x | x | x | x | x | x | x | x |
| Self-training | Gym, weights-lifting, swimming or outdoor training | x | x | x | x | x | x | x | x |
| Outcomes | Body function | x | x | x | x | x | x | - | x |
|  | Activity | x | x | x | x | x | x | x | x |
|  | Participation | - | x | - | - | x | - | - | - |
|  | Health-related quality of life | - | - | - | x | - | - | - | x |
|  | Goal attainment | - | - | - | - | x | - | - | - |
|  | Patient satisfaction | x | - | x | - | x | - | - | - |
| *T1/T2=first/second time point in evaluation of responsiveness, x=present (provided), -=not present (not provided), *rheumatologist or specialist in physical medicine and rehabilitation.* | | | | | | | | | |
